# Supplementary material for: Identification of candidate miRNA biomarkers for facioscapulohumeral muscular dystrophy using DUX4-based mouse models
Source: PubMed Central journal article supplement (PMC8405850; doi:10.1242/dmm.049016), 2021-08-24
Supplement: dmm-14-049016-s1.pdf [file dmm-14-049016-s1.pdf]

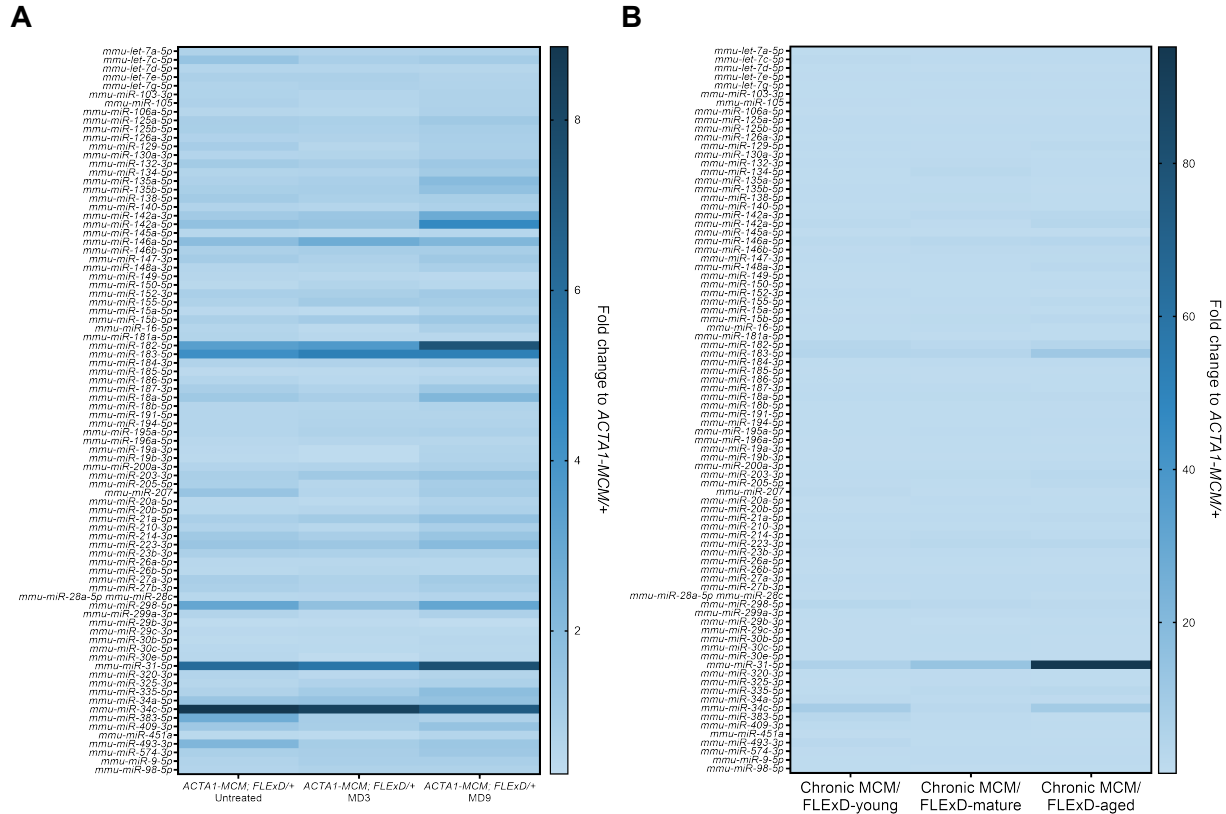

**Fig. S1. Immunopathology-associated miRNA profile in the gastrocnemius muscle from FSHD-like mouse models.** (A, B) Heat maps depicting the miRNA profile as determined using the immunopathology panel in (A) the moderate DUX4 induced FSHD-like mouse model and (B) the DUX4 chronic FSHD-like mouse models (n=8 animals for *ACTA1-MCM;FLEXD/+* untreated, n=8 animals for *ACTA1-MCM;FLEXD/+* MD3, n=8 animals for *ACTA1-MCM;FLEXD/+* MD9, n=7 animals for *ACTA1-MCM/+* 6 months-old, n=9 animals for chronic MCM/FLEXD-mature, n=6 animals for *ACTA1-MCM/+* 14-18 months-old and n=8 animals for chronic MCM/FLEXD-aged experimental groups).

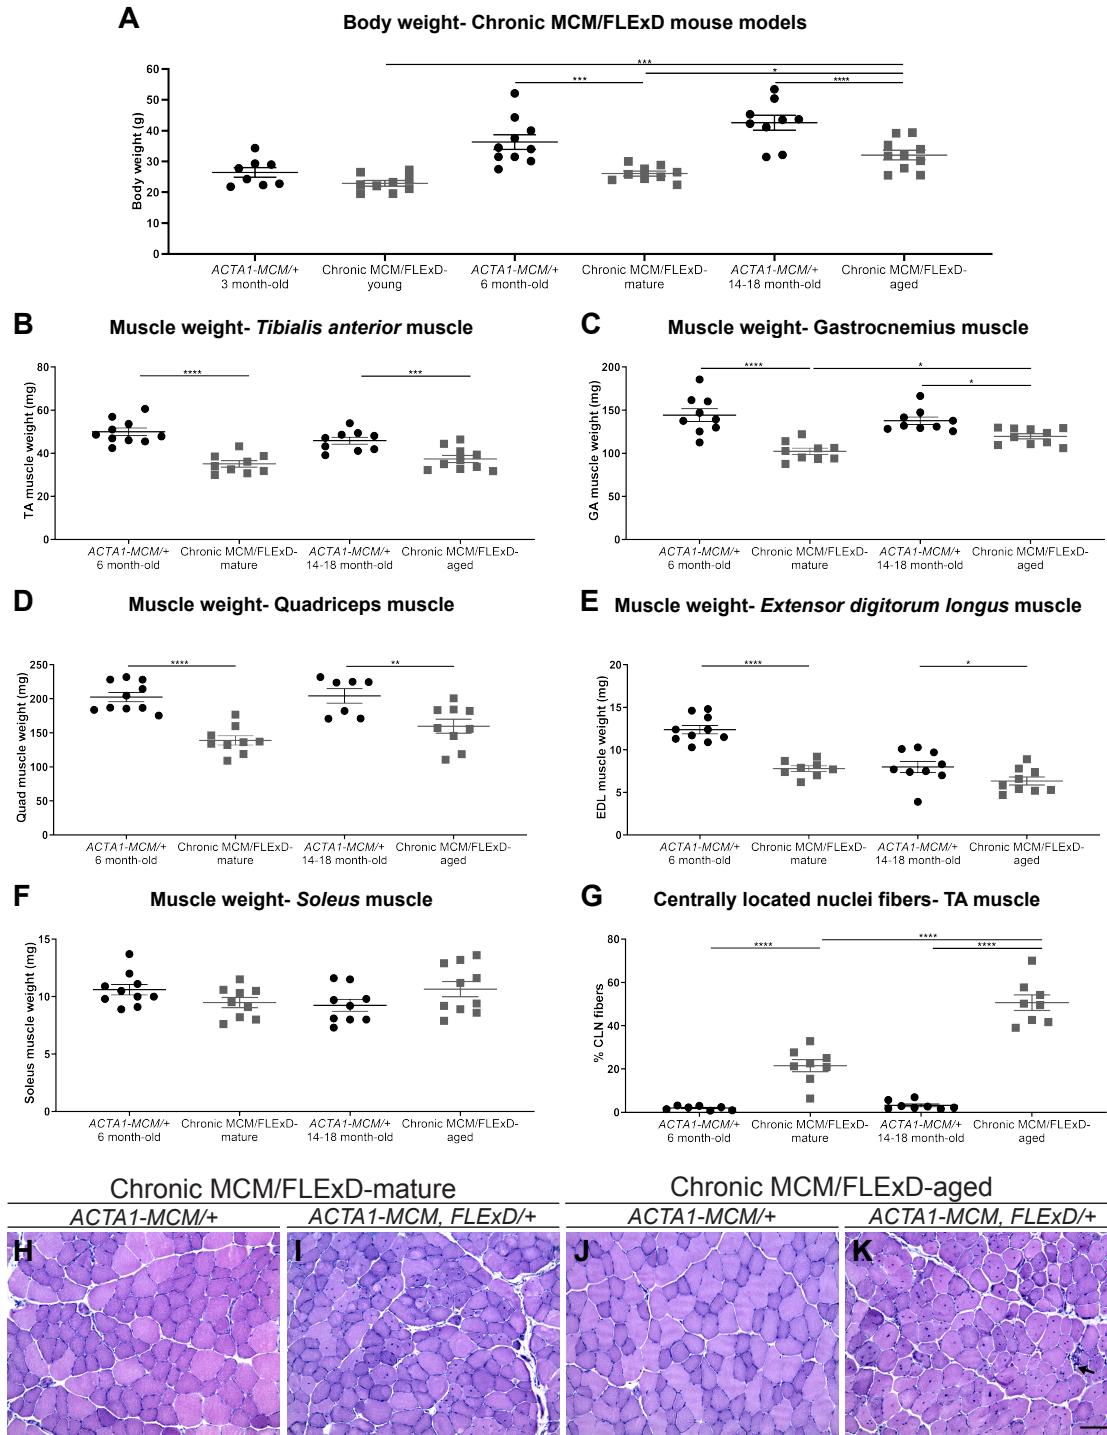



**Fig. S2. Body and muscle weight of skeletal muscles and histopathology analysis of *tibialis anterior* muscle.** (A) Body weight of chronic MCM/FLExD mouse models. Statistical analysis was performed with two tailed one-way ANOVA (uncorrected Fisher's LSD) with an n=8 animals for *ACTAI-MCM/+* 1 month-old, n=9 animals for *ACTAI-MCM;FLExD/+* 1 month-old, n=10 animals for *ACTAI-MCM/+* 6 months-old, n=9 animals for chronic MCM/FLExD-mature, n=9 animals for *ACTAI-MCM/+* 14-18 months-old and n=10 animals for chronic MCM/FLExD-aged experimental groups. (B-F) Muscle weight of *tibialis anterior* (n=10 animals for *ACTAI-MCM/+* 6 months-old, n=9 animals for chronic MCM/FLExD-mature, n=9 animals for *ACTAI-MCM/+* 14-18 months-old and n=10 animals for chronic MCM/FLExD-aged experimental groups) (B), gastrocnemius (n=9 animals for *ACTAI-MCM/+* 6 months-old, n=9 animals for chronic MCM/FLExD-mature, n=9 animals for *ACTAI-MCM/+* 14-18 months-old and n=10 animals for chronic MCM/FLExD-aged experimental groups) (C), quadriceps (n=9 animals for *ACTAI-MCM/+* 6 months-old, n=9 animals for chronic MCM/FLExD-mature, n=7 animals for *ACTAI-MCM/+* 14-18 months-old and n=9 animals for chronic MCM/FLExD-aged experimental groups) (D), *extensor digitorum longus* (n=10 animals for *ACTAI-MCM/+* 6 months-old, n=8 animals for chronic MCM/FLExD-mature, n=9 animals for *ACTAI-MCM/+* 14-18 months-old and n=9 animals for chronic MCM/FLExD-aged experimental groups) (E) and *soleus* (n=10 animals for *ACTAI-MCM/+* 6 months-old, n=9 animals for chronic MCM/FLExD-mature, n=9 animals for *ACTAI-MCM/+* 14-18 months-old and n=10 animals for chronic MCM/FLExD-aged experimental groups) (F) muscles. Statistical analysis was performed with two tailed one-way ANOVA (uncorrected Fisher's LSD). (G) Centrally located nuclei fibers quantification in *tibialis anterior* muscle. Statistical analysis was performed with two tailed one-way ANOVA (uncorrected Fisher's LSD) with an n=7 animals for *ACTAI-MCM/+* 6 months-old, n=8 animals for chronic MCM/FLExD-mature, n=8 animals for *ACTAI-MCM/+* 14-18 months-old and n=8 animals for chronic MCM/FLExD-aged experimental groups. Data is presented as mean  $\pm$  s.e.m.; \*  $p < 0.05$ , \*\*  $p < 0.01$ , \*\*\* $p < 0.001$ , \*\*\*\* $p < 0.0001$ . (H-K) Hematoxylin and Eosin staining of *tibialis anterior* (TA) muscles from (H, I) chronic MCM/FLExD-mature mice and age matched 6 month-old *ACTAI-MCM/+* controls and (J, K) chronic MCM/FLExD-mature mice and age matched 14-18 months-old *ACTAI-MCM/+* controls. Black arrow (K) depicts a damaged fiber with immune infiltrate. Representative images from n=3 animals for each experimental group Bar = 50  $\mu$ m.

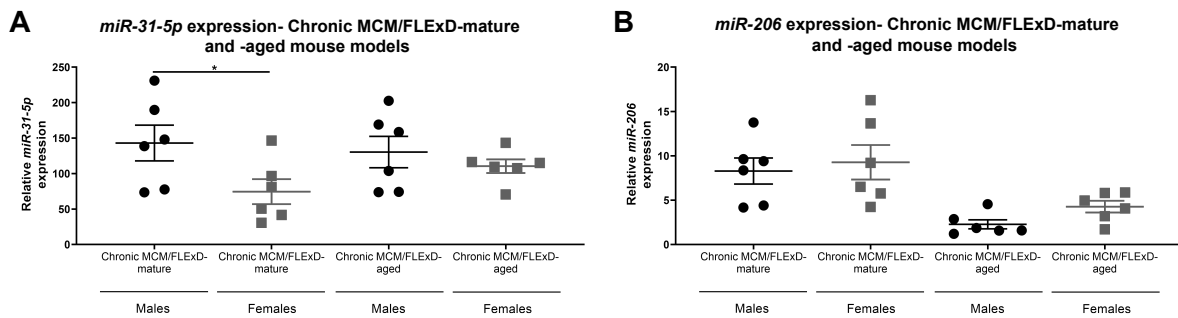

**Fig. S3. miRNA expression in the chronic DUX4 mouse models.** (A) *miR-31-5p* expression in the gastrocnemius muscle from male and female chronic MCM/FLEXD-mature and -aged mouse models. (B) *miR-206* expression in the gastrocnemius muscle from male and female chronic MCM/FLEXD-mature and -aged mouse models. Statistical analysis was performed with two-tailed one-way ANOVA (uncorrected Fisher's LSD) with an n=6 animals for chronic MCM/FLEXD-mature and aged experimental groups. Data is presented as mean ± s.e.m.; \* p<0.05.

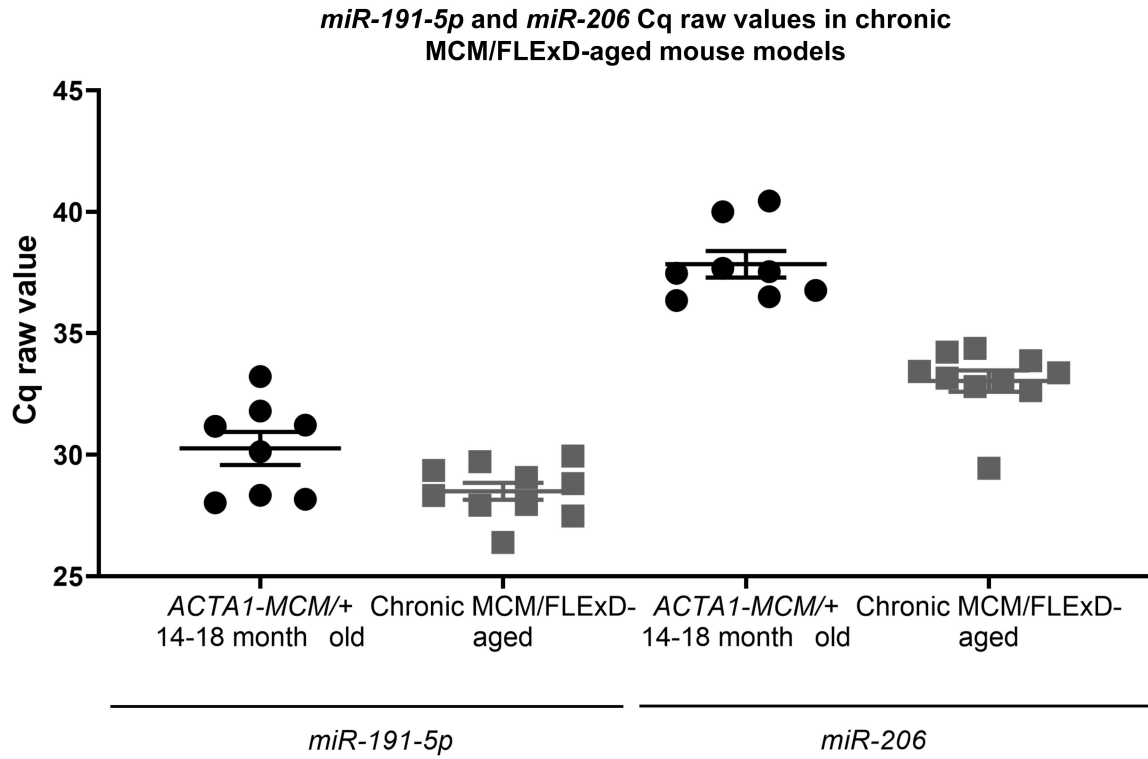

**Fig. S4. Serum analysis of *miR-191-5p* and *miR-206* expression in the chronic MCM/FLExD-aged mouse model.** Cq raw values for *miR-191-5p* and *miR-206* expression in the serum from *ACTA1-MCM/+* 14-18-month-old and chronic MCM/FLExD-aged mice.

**Table S1. Fold change relative expression raw data for miScript analysis.** Raw fold change values for relative expression in the miRNA profile panel. Red boxes: Statistically significant upregulation, fold change above a 2-fold threshold. Blue boxes: Statistically significant downregulation, fold change below 0.5-fold change. Gray boxes: Statistically significant fold changes above or below the defined analysis threshold.

| miRNA ID                                 | MD3  | MD9  | 1 month old | 6 months old | 14-18 months old |
|------------------------------------------|------|------|-------------|--------------|------------------|
| <i>mmu-let-7a-5p</i>                     | 0.73 | 0.76 | 0.81        | 0.85         | 1.01             |
| <i>mmu-let-7c-5p</i>                     | 0.96 | 1.12 | 1.52        | 1.02         | 1.04             |
| <i>mmu-let-7d-5p</i>                     | 0.67 | 0.60 | 0.66        | 0.55         | 0.58             |
| <i>mmu-let-7e-5p</i>                     | 0.89 | 0.73 | 0.90        | 1.10         | 0.90             |
| <i>mmu-let-7g-5p</i>                     | 0.85 | 0.75 | 0.74        | 0.84         | 0.72             |
| <i>mmu-miR-103-3p</i>                    | 0.65 | 0.82 | 0.77        | 0.92         | 0.93             |
| <i>mmu-miR-105</i>                       | 0.67 | 0.81 | 0.85        | 0.84         | 0.83             |
| <i>mmu-miR-106a-5p</i>                   | 0.56 | 0.85 | 0.61        | 0.55         | 0.50             |
| <i>mmu-miR-125a-5p</i>                   | 0.93 | 1.27 | 1.00        | 0.93         | 0.96             |
| <i>mmu-miR-125b-5p</i>                   | 0.87 | 1.02 | 0.98        | 1.19         | 0.97             |
| <i>mmu-miR-126a-3p</i>                   | 0.79 | 0.95 | 0.78        | 0.76         | 0.62             |
| <i>mmu-miR-129-5p</i>                    | 0.61 | 0.93 | 1.05        | 0.94         | 1.78             |
| <i>mmu-miR-130a-3p</i>                   | 0.71 | 0.94 | 0.69        | 0.99         | 0.78             |
| <i>mmu-miR-132-3p</i>                    | 0.99 | 1.32 | 1.18        | 1.51         | 1.15             |
| <i>mmu-miR-134-5p</i>                    | 0.74 | 1.17 | 0.72        | 2.52         | 1.00             |
| <i>mmu-miR-135a-5p</i>                   | 0.96 | 1.99 | 0.84        | 1.15         | 0.75             |
| <i>mmu-miR-135b-5p</i>                   | 1.02 | 1.67 | 0.98        | 0.96         | 0.40             |
| <i>mmu-miR-138-5p</i>                    | 0.93 | 0.98 | 1.18        | 1.35         | 0.67             |
| <i>mmu-miR-140-5p</i>                    | 0.85 | 0.86 | 0.76        | 0.90         | 0.76             |
| <i>mmu-miR-142a-3p</i>                   | 1.40 | 2.80 | 1.21        | 2.02         | 2.84             |
| <i>mmu-miR-142a-5p</i>                   | 1.53 | 4.50 | 1.69        | 0.87         | 3.46             |
| <i>mmu-miR-145a-5p</i>                   | 0.45 | 0.59 | 0.56        | 0.58         | 0.42             |
| <i>mmu-miR-146a-5p</i>                   | 2.74 | 2.19 | 1.85        | 2.75         | 3.31             |
| <i>mmu-miR-146b-5p</i>                   | 1.01 | 1.03 | 0.91        | 1.47         | 1.54             |
| <i>mmu-miR-147-3p</i>                    | 0.85 | 1.26 | 1.10        | 0.95         | 1.37             |
| <i>mmu-miR-148a-3p</i>                   | 0.72 | 0.95 | 0.67        | 1.17         | 2.14             |
| <i>mmu-miR-149-5p</i>                    | 0.54 | 0.49 | 0.60        | 0.84         | 0.74             |
| <i>mmu-miR-150-5p</i>                    | 0.71 | 0.56 | 0.51        | 0.74         | 0.97             |
| <i>mmu-miR-152-3p</i>                    | 0.97 | 1.19 | 0.96        | 0.83         | 0.59             |
| <i>mmu-miR-155-5p</i>                    | 1.17 | 1.07 | 0.82        | 1.17         | 1.70             |
| <i>mmu-miR-15a-5p</i>                    | 0.41 | 0.82 | 0.48        | 0.92         | 0.70             |
| <i>mmu-miR-15b-5p</i>                    | 1.15 | 1.32 | 0.91        | 1.35         | 2.01             |
| <i>mmu-miR-16-5p</i>                     | 0.44 | 0.89 | 0.65        | 1.05         | 0.83             |
| <i>mmu-miR-181a-5p</i>                   | 0.53 | 0.53 | 0.71        | 0.47         | 0.71             |
| <i>mmu-miR-182-5p</i>                    | 3.68 | 7.36 | 3.42        | 2.03         | 3.82             |
| <i>mmu-miR-183-5p</i>                    | 4.98 | 4.97 | 4.19        | 3.87         | 11.10            |
| <i>mmu-miR-184-3p</i>                    | 0.78 | 0.96 | 0.75        | 1.00         | 0.98             |
| <i>mmu-miR-185-5p</i>                    | 0.46 | 0.48 | 0.43        | 0.35         | 0.31             |
| <i>mmu-miR-186-5p</i>                    | 0.50 | 0.67 | 0.65        | 0.59         | 0.72             |
| <i>mmu-miR-187-3p</i>                    | 0.76 | 1.31 | 1.00        | 1.03         | 0.65             |
| <i>mmu-miR-18a-5p</i>                    | 1.00 | 2.18 | 1.28        | 1.36         | 1.42             |
| <i>mmu-miR-18b-5p</i>                    | 0.67 | 0.77 | 0.64        | 0.84         | 0.86             |
| <i>mmu-miR-191-5p</i>                    | 0.72 | 0.70 | 0.65        | 0.73         | 0.91             |
| <i>mmu-miR-194-5p</i>                    | 0.74 | 0.74 | 0.67        | 0.80         | 1.04             |
| <i>mmu-miR-195a-5p</i>                   | 0.80 | 0.86 | 0.67        | 0.95         | 0.89             |
| <i>mmu-miR-196a-5p</i>                   | 0.63 | 0.61 | 0.55        | 0.67         | 0.55             |
| <i>mmu-miR-19a-3p</i>                    | 0.36 | 0.71 | 0.48        | 0.72         | 0.70             |
| <i>mmu-miR-19b-3p</i>                    | 0.37 | 0.76 | 0.46        | 0.49         | 0.42             |
| <i>mmu-miR-200a-3p</i>                   | 0.76 | 0.90 | 0.68        | 0.84         | 1.00             |
| <i>mmu-miR-203-3p</i>                    | 1.27 | 1.47 | 0.97        | 1.34         | 2.31             |
| <i>mmu-miR-205-5p</i>                    | 0.61 | 1.05 | 0.92        | 0.66         | 1.62             |
| <i>mmu-miR-207</i>                       | 0.67 | 1.10 | 1.49        | 0.58         | 0.44             |
| <i>mmu-miR-20a-5p</i>                    | 0.46 | 0.76 | 0.55        | 1.00         | 0.73             |
| <i>mmu-miR-20b-5p</i>                    | 0.63 | 0.87 | 0.56        | 0.80         | 0.68             |
| <i>mmu-miR-21a-5p</i>                    | 1.17 | 1.61 | 0.96        | 1.15         | 1.42             |
| <i>mmu-miR-210-3p</i>                    | 0.57 | 0.96 | 0.75        | 0.80         | 0.83             |
| <i>mmu-miR-214-3p</i>                    | 1.00 | 1.48 | 1.25        | 1.88         | 1.05             |
| <i>mmu-miR-223-3p</i>                    | 1.36 | 1.99 | 1.44        | 2.41         | 2.92             |
| <i>mmu-miR-23b-3p</i>                    | 0.86 | 0.80 | 0.91        | 0.97         | 0.88             |
| <i>mmu-miR-26a-5p</i>                    | 0.53 | 0.57 | 0.53        | 0.74         | 0.60             |
| <i>mmu-miR-26b-5p</i>                    | 0.60 | 0.57 | 0.51        | 0.61         | 0.60             |
| <i>mmu-miR-27a-3p</i>                    | 0.81 | 1.18 | 0.99        | 1.09         | 1.14             |
| <i>mmu-miR-27b-3p</i>                    | 0.78 | 1.03 | 0.90        | 1.05         | 1.10             |
| <i>mmu-miR-28a-5p</i> <i>mmu-miR-28c</i> | 0.58 | 0.69 | 0.57        | 0.98         | 0.53             |
| <i>mmu-miR-298-5p</i>                    | 1.72 | 3.04 | 3.03        | 2.08         | 1.57             |
| <i>mmu-miR-299a-3p</i>                   | 0.48 | 0.85 | 0.70        | 0.90         | 1.07             |
| <i>mmu-miR-29b-3p</i>                    | 0.39 | 0.32 | 0.36        | 0.28         | 0.35             |
| <i>mmu-miR-29c-3p</i>                    | 0.52 | 0.47 | 0.49        | 0.57         | 0.67             |
| <i>mmu-miR-30b-5p</i>                    | 0.46 | 0.53 | 0.42        | 0.64         | 0.60             |
| <i>mmu-miR-30c-5p</i>                    | 0.47 | 0.52 | 0.50        | 0.66         | 0.59             |
| <i>mmu-miR-30e-5p</i>                    | 0.33 | 0.55 | 0.54        | 0.60         | 0.52             |
| <i>mmu-miR-31-5p</i>                     | 5.51 | 7.56 | 8.06        | 13.78        | 95.20            |
| <i>mmu-miR-320-3p</i>                    | 0.48 | 0.70 | 0.68        | 0.87         | 0.63             |
| <i>mmu-miR-325-3p</i>                    | 0.78 | 0.86 | 0.61        | 0.85         | 0.79             |
| <i>mmu-miR-335-5p</i>                    | 1.13 | 1.84 | 0.79        | 1.61         | 2.42             |
| <i>mmu-miR-34a-5p</i>                    | 1.54 | 1.62 | 1.44        | 1.23         | 0.94             |
| <i>mmu-miR-34c-5p</i>                    | 8.31 | 8.97 | 8.86        | 1.98         | 9.73             |
| <i>mmu-miR-383-5p</i>                    | 1.05 | 0.84 | 2.69        | 1.19         | 0.58             |
| <i>mmu-miR-409-3p</i>                    | 1.01 | 1.55 | 1.30        | 1.12         | 0.69             |
| <i>mmu-miR-451a</i>                      | 0.41 | 0.67 | 0.47        | 0.72         | 0.35             |
| <i>mmu-miR-493-3p</i>                    | 1.08 | 1.38 | 2.21        | 0.75         | 0.73             |
| <i>mmu-miR-574-3p</i>                    | 0.99 | 1.29 | 0.92        | 1.14         | 0.92             |
| <i>mmu-miR-9-5p</i>                      | 0.95 | 0.95 | 0.75        | 1.22         | 1.05             |
| <i>mmu-miR-98-5p</i>                     | 0.81 | 0.82 | 0.68        | 0.53         | 0.70             |

**Table S2. Participant information.** DRA = D4Z4 reduced allele. NA = Not applicable. Shortest chromosome 4qA D4Z4 EcoRI/BlnI fragment is >41kb and therefore not FSHD1.

| Subject ID | Gender | Age | Status                    | DRA (EcoRI/BlnI) |
|------------|--------|-----|---------------------------|------------------|
| 1          | Male   | 78  | Clinically affected FSHD1 | 19kb             |
| 2          | Female | 31  | Clinically affected FSHD1 | 18kb             |
| 3          | Male   | 60  | Clinically affected FSHD1 | 22kb             |
| 4          | Male   | 53  | Clinically affected FSHD1 | 26kb             |
| 5          | Male   | 79  | Clinically affected FSHD1 | 34kb             |
| 6          | Male   | 40  | Clinically affected FSHD1 | 22kb             |
| 7          | Male   | 48  | Clinically affected FSHD1 | 22kb             |
| 8          | Female | 51  | Clinically affected FSHD1 | 16kb             |
| 9          | Male   | 17  | Clinically affected FSHD1 | 16kb             |
| 10         | Male   | 32  | Clinically affected FSHD1 | 24kb             |
| 11         | Male   | 56  | Clinically affected FSHD1 | 26kb             |
| 12         | Female | 72  | Clinically affected FSHD1 | 27kb             |
| 13         | Female | 72  | Clinically affected FSHD1 | 27kb             |
| 14         | Male   | 30  | Clinically affected FSHD1 | 27kb             |
| 15         | Male   | 59  | Clinically affected FSHD2 | 42kb             |
| 16         | Male   | 51  | Healthy                   | NA               |
| 17         | Male   | 37  | Healthy                   | NA               |
| 18         | Female | 68  | Healthy                   | NA               |
| 19         | Female | 52  | Healthy                   | NA               |
| 20         | Female | 57  | Healthy                   | NA               |
| 21         | Male   | 43  | Healthy                   | NA               |
| 22         | Male   | 66  | Healthy                   | NA               |
| 23         | Male   | 81  | Healthy                   | NA               |
| 24         | Male   | 47  | Healthy                   | NA               |
| 25         | Male   | 52  | Healthy                   | NA               |
| 26         | Female | 36  | Healthy                   | NA               |
| 27         | Female | 32  | Healthy                   | NA               |
| 28         | Female | 24  | Healthy                   | NA               |
| 29         | Male   | 77  | Healthy                   | NA               |
| 30         | Male   | 73  | Healthy                   | NA               |
